# Supplementary material
Source: PubMed Central journal article supplement (PMC1131934)
Supplement: nar_33_9_2852__1.pdf [file nar_33_9_2852__1.pdf]

**Primer sequence used for RT-PCR:**

*INCENP (CG12165):*

Forward: 5'-ATGGAGGACATCTTGGGCG-3'; Reverse: 5'-CCGCATCTTACGGTTGAGTG-3'

*Aurora B (CG6620):*

Forward: 5'-TGAGATGGGCGCCCACTT-3'; Reverse: 5'-TTCGCCACTTGGTAGGTGTA-3'

*Asp (CG6875):*

Forward: 5'-ATGGAGCTAGTGTGGAGCC-3'; reverse: 5'-GGTGAGAGGTGTGAATCGC-3'

*McM3 (CG4206):*

Forward: 5'-GAGGGGGAGCAGTTCATCA -3'; reverse: 5'-AAACCGTATTCGGTCTCCAG-3'

*McM5 (CG4082):*

Forward: 5'-TGGAAGGCTTCGACGATGC-3'; reverse: 5'-CAGGACAGGCATTGGATAGA-3'

*McM7 (CG4978):*

Forward: 5'-ATCTGTATCAACAAGAACGAC-3'; Reverse: 5'-GCTATCGAAATGGTCTGCTG-3'

*CDC45 (CG3658):*

Forward: 5'- ATGTTTGTCCAGGATCTGCG-3'; Reverse: 5'-CTGAGCTTACGGCTCCTTG-3'

*Actin 5C:*

Forward: 5'-TGCCCATCTACGAGGGTTAT-3'; Reverse: 5'-AGTACTTGCGCTCTGGCGG-3'

**Primers used for ChIP analysis:**

*F-element:*

Forward: 5'- ATCACGGTAG AAGAGCCGCA -3'; Reverse: 5'-TGTGAAGACGGATTTTCAGCTC -3'

*I360:*

Forward: 5'- TGTATCGTTT TAAAAAATT GTCAG -3'; Reverse: 5'- GTGGACCTGTAATATATGCTCT -3'

*TART:*

Forward: 5' - GTACAACCAA AGTTGACGGG - 3'; Reverse : 5' - TGTATCGATATTTTCGCGCTTTT - 3'

*McM3 (CG4206):*

Forward: 5'- ATTTGCGTTTGCCTCCGAAC -3'; Reverse: 5'-CAGTAGCCCCAATGCACGT-3'

*McM5 (CG4082):*

Forward: 5'- TCTAGCTACCGCTTGCCCG -3'; Reverse: 5'-TTGTAGAAAAAGTTCTCCTCGTT -3'

*McM7 (CG4978):*

Forward: 5'-GGCTCGACGAGATTATGCC-3'; Reverse: 5'-GGACAGTGGTTTGAAGCCC-3'

*Tam (CG8987):*

Forward: 5'-GCGCACAAAATACCTAGGC-3'; Reverse: 5'-CACATCGAAGACAAGTCCCT-3'

*Actin 5C (CG 4027):*

Forward : 5`-TGCCCATCTACGAGGGTTAT-3`; Reverse : 5` -CGGTGGTGGTGAAAGAGTAA - 3`

*Aurora B (CG6620):*

Forward: 5'-TCAGCATTCGAAAAAACGCGC-3'; Reverse: 5'-TCGTATCTGGAGGGAGCAGAT-3'
